# Supplementary material for: Developmental Sequences in Second Language Phonology: Effects of Instruction on the Acquisition of Foreign sC Onsets
Source: Frontiers journal article supplement (doi:10.3389/fcomm.2021.662934), 2021-05-28
Supplement: Data_Sheet_1.doc [file Data_Sheet_1.doc]

**APPENDIX A: TAKI PSEUDOWORDS USED IN THE ORAL TESTS: PHONEMIC**

**TRANSCRIPTIONS AND ENGLISH TRANSLATION***

**Pretest: Target words and distractors**

| **/st/** | | **/sn/** | | **/sl/** | |
| --- | --- | --- | --- | --- | --- |
| stukab | *clarinet* | snapib | *microwave oven* | slakap | *radio* |
| stinup | *orange* | snomip | *toothbrush* | slimub | *map* |
| stibut | *envelope* | snumat | *light bulb* | slugad | *garlic* |
| stemid | *chicken* | snagud | *telephone* | slobit | *egg* |
| stamik | *dress* | snipuk | *hot dog* | slegak | *hat* |
| stopug | *glasses* | snetag | *spider* | slubig | *sandwich* |
| **Distractors** | | | | | |
| isnoka | *pineapple* | istedu | *screwdriver* | kopa | *binoculars* |
| islepi | *sword* | muki | *truck* | sutu | *cigarette* |

**Posttest: Target words and distractors**

| **/st/** | | **/sn/** | | | **/sl/** | |
| --- | --- | --- | --- | --- | --- | --- |
| stunap | *motorcycle* | snotip | | *bottle* | slekab | *carrot* |
| stagib | *ball* | snikub | | *flip flops* | slagup | *tiger* |
| stimut | *kite* | snukid | | *onion* | slopat | *printer* |
| stekud | *helmet* | snapit | | *credit card* | slumid | *money* |
| stapak | *foot* | snobuk | | *cup* | slibug | *iron* |
| stunig | *briefcase* | snudig | | *saxophone* | slenak | *hammock* |
| **Distractors** | | | | | | |
| isnadu | *spoon* | | istodi | *turntable* | kapi | *shorts* |
| islika | *earrings* | | toku | *eye* | mida | *USB key* |

**Delayed posttest: Target words and distractors**

| **/st/** | | | **/sn/** | | **/sl/** | |
| --- | --- | --- | --- | --- | --- | --- |
| stakub | *banana* | | snikab | *knife* | sledib | *book* |
| stenup | *escalator* | | snugip | *laptop* | slokap | *flag* |
| stogud | *trumpet* | | sneput | *backpack* | slibad | *mosquito* |
| stumit | *elephant* | | snigat | *key chain* | slupid | *fan* |
| stimag | *jacket* | | snabuk | *lion* | sliguk | *ring* |
| stupig | *drum* | | snomak | *bicycle* | slamig | *socks* |
| **Distractors** | | | | | | |
| isnepi | *camera* | istaku | | *latter* | kipu | *stapler* |
| islota | *mirror* | neki | | *newspaper* | suda | *calculator* |

* In addition to the 18 target sC-initial words (6 st, 6 sn, 6 sl), each test included six distractors that consisted of unrelated non sC-initial pseudowords (e.g., neki, isnadu). To aid learning and recall, these words were presented to the participants (in both instruction and tests) accompanied by their associated pictorial representations (as shown in Appendix B) so that the participants could establish word-to-meaning associations. The tests, however, did not assess the acquisition of vocabulary and associated meaning.

**APPENDIX B: TAKI PSEUDOWORDS USED IN A TEACHING SESSION**

**(M GROUP): A SAMPLE***


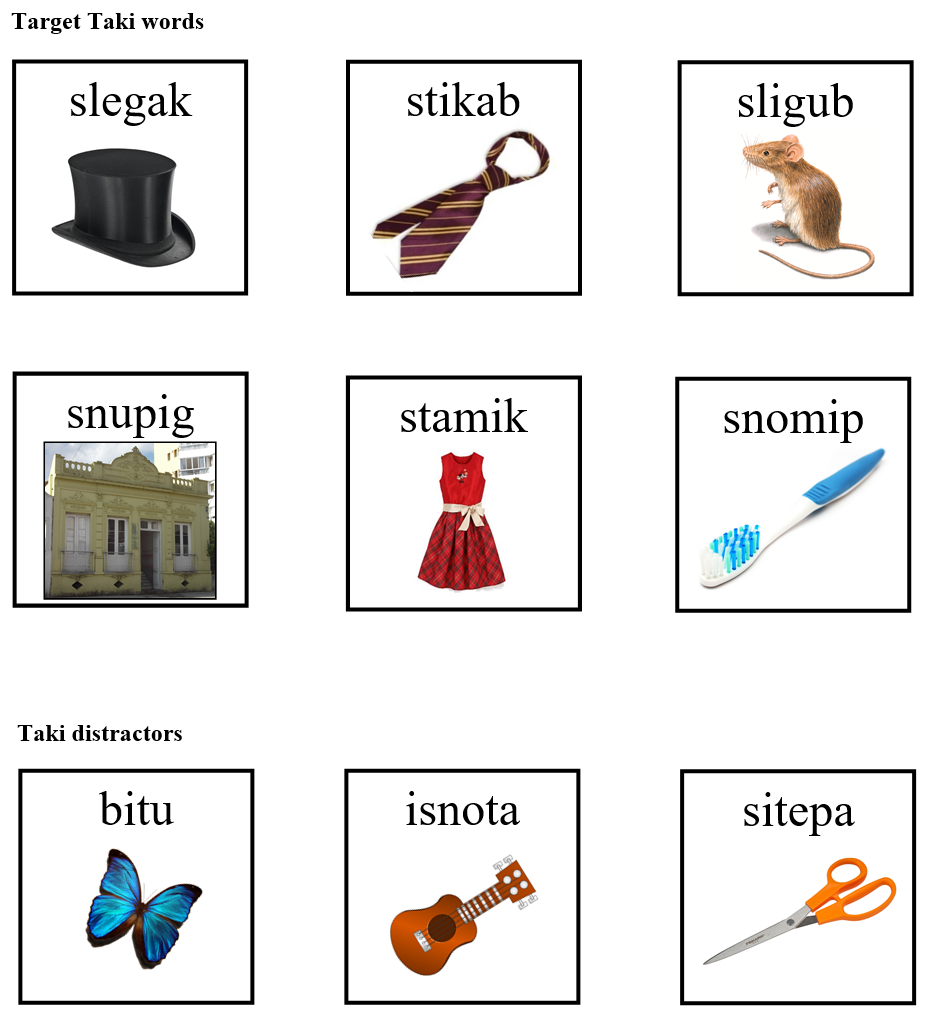


* The Taki words illustrated above were utilized in one of the classes taught in Mixed Group (M). A similar format was adopted for Groups P and T. The images used in this study were downloaded from http://openclipart.org or searched via the http://yotophoto.com search engine (now defunct). According to Yotophoto, they are not subject to copyright: “Yotophoto is a search engine for free-to-use stock photographs and images. These are images that are either in the Public Domain or released under generous Creative Commons, or similar licenses […] to help educators, bloggers and digital artists find photos they can use”.
